# Supplementary material for: Non-SMC condensin I complex subunit D2 (NCAPD2) reveals its prognostic and immunologic features in human cancers
Source: publisher site journal article supplement (doi:10.18632/aging.204904), 2023-07-26
Supplement: Supplementary file [file aging-v15i14-204904-supplementary-material-SD1.pdf]

**SUPPLEMENTARY FIGURE**

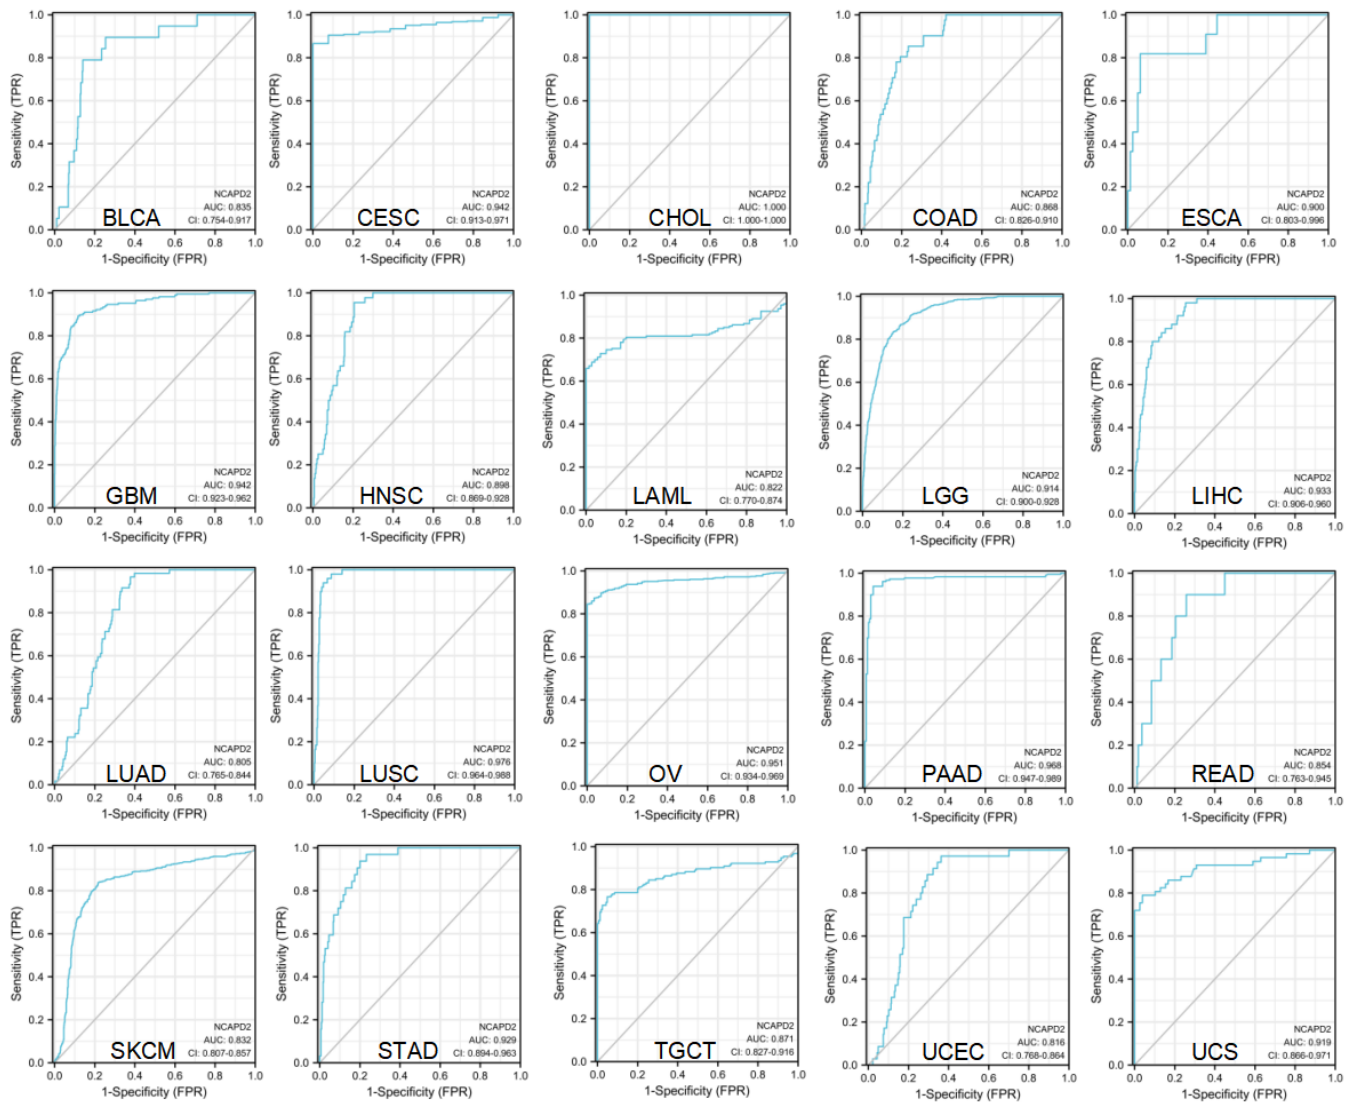

**Supplementary Figure 1. The ROC curve of NCAPD2 in 20 types of tumors, distinguishing cancers from normal tissues.**
